# Supplementary material for: A2P2S6 (A = Ba and Pb): a good platform to study the polymorph effect and lone pair effect to form an acentric structure
Source: Royal Society of Chemistry journal article supplement (doi:10.1039/d1dt04317j), 2022-01-01
Supplement: d1dt04317j1.pdf [file d1dt04317j1.pdf]

## Supporting information

### $A_2P_2S_6$ (A=Ba, Pb): A Good Platform to Study Polymorph Effect and Lone Pairs Effect to Form Acentric Structure

Bingheng Ji <sup>a</sup>, Arka Sarkar <sup>b</sup>, Kui Wu <sup>c</sup>, Andrew Swindle <sup>d</sup>, Jian Wang <sup>a,\*</sup>,

<sup>a</sup> Department of Chemistry and Biochemistry, Wichita State University, Wichita, Kansas 67260, United States

<sup>b</sup> Department of Chemistry, Iowa State University, Ames, Iowa, 50011, United States

<sup>c</sup> College of Chemistry and Environmental Science, Hebei University, Key Laboratory of Analytical Science and Technology of Hebei Province, Baoding 071002, China

<sup>d</sup> Department of Geology, Wichita State University, Wichita, Kansas 67260, United States

1. **Table S1.** Refined crystallographic parameters of  $\alpha$ -Ba<sub>2</sub>P<sub>2</sub>S<sub>6</sub>,  $\beta$ -Ba<sub>2</sub>P<sub>2</sub>S<sub>6</sub>, and Pb<sub>2</sub>P<sub>2</sub>S<sub>6</sub>.
2. **Table S2.** Atomic coordinate parameters for  $\alpha$ -Ba<sub>2</sub>P<sub>2</sub>S<sub>6</sub>,  $\beta$ -Ba<sub>2</sub>P<sub>2</sub>S<sub>6</sub>, and Pb<sub>2</sub>P<sub>2</sub>S<sub>6</sub>.
3. **Table S3.** Selected interatomic distances for  $\alpha$ -Ba<sub>2</sub>P<sub>2</sub>S<sub>6</sub>,  $\beta$ -Ba<sub>2</sub>P<sub>2</sub>S<sub>6</sub>, and Pb<sub>2</sub>P<sub>2</sub>S<sub>6</sub>.
4. **Table S4.** Results of EDX analysis of selected crystals of  $\alpha$ -Ba<sub>2</sub>P<sub>2</sub>S<sub>6</sub>,  $\beta$ -Ba<sub>2</sub>P<sub>2</sub>S<sub>6</sub>, and Pb<sub>2</sub>P<sub>2</sub>S<sub>6</sub>.
5. **Figure S1.** Powder X-ray diffraction results of theoretical, as-synthesized, after DSC measurement, acid treated, and 1223 K quenched Pb<sub>2</sub>P<sub>2</sub>S<sub>6</sub>.
6. **Figure S2.** Powder X-ray diffraction results of theoretical, as-synthesized, after DSC measurement, and 1223 K quenched  $\alpha$ -Ba<sub>2</sub>P<sub>2</sub>S<sub>6</sub>.
7. **Figure S3.** Powder X-ray diffraction results of theoretical, as-synthesized, and 1223 K quenched  $\beta$ -Ba<sub>2</sub>P<sub>2</sub>S<sub>6</sub>.
8. **Figure S4.** Kubelka-Munk Diffuse reflectance solid-state UV–Vis spectra of  $\alpha$ -Ba<sub>2</sub>P<sub>2</sub>S<sub>6</sub>.
9. **Figure S5.** Kubelka-Munk Diffuse reflectance solid-state UV–Vis spectra of  $\beta$ -Ba<sub>2</sub>P<sub>2</sub>S<sub>6</sub>.
10. **Figure S6.** Kubelka-Munk Diffuse reflectance solid-state UV–Vis spectra of Pb<sub>2</sub>P<sub>2</sub>S<sub>6</sub>.
11. **Figure S7.** Tauc plots for allowed direct and indirect transitions of  $\alpha$ -Ba<sub>2</sub>P<sub>2</sub>S<sub>6</sub>.
12. **Figure S8.** Tauc plots for allowed direct and indirect transitions of  $\beta$ -Ba<sub>2</sub>P<sub>2</sub>S<sub>6</sub>.

**13. Figure S9.** Tauc plots for allowed direct and indirect transitions of  $\text{Pb}_2\text{P}_2\text{S}_6$ .

**1. Table S1.** Refined crystallographic parameters of  $\alpha$ -Ba<sub>2</sub>P<sub>2</sub>S<sub>6</sub>,  $\beta$ -Ba<sub>2</sub>P<sub>2</sub>S<sub>6</sub>, and Pb<sub>2</sub>P<sub>2</sub>S<sub>6</sub>.

| Compound                              | $\alpha$ -Ba <sub>2</sub> P <sub>2</sub> S <sub>6</sub> | $\beta$ -Ba <sub>2</sub> P <sub>2</sub> S <sub>6</sub> | Pb <sub>2</sub> P <sub>2</sub> S <sub>6</sub> |
|---------------------------------------|---------------------------------------------------------|--------------------------------------------------------|-----------------------------------------------|
| Formula weight (g mol <sup>-1</sup> ) | 528.98                                                  | 264.49                                                 | 668.68                                        |
| Crystal color                         | Pink/light orange                                       | white                                                  | yellow orange                                 |
| Temperature                           |                                                         | 298(2) K                                               |                                               |
| Radiation, wavelength                 |                                                         | Mo-K $\alpha$ , 0.71073 Å                              |                                               |
| Crystal system                        |                                                         | Monoclinic                                             |                                               |
| Space group                           | <i>Pn</i> (no.7)                                        | <i>P2<sub>1</sub>/n</i> (no. 14)                       | <i>Pn</i> (no.7)                              |
| a(Å)                                  | 6.7411(2)                                               | 6.7459(6)                                              | 6.5961(6)                                     |
| b(Å)                                  | 7.5818(2)                                               | 7.5871(6)                                              | 7.4542(7)                                     |
| c(Å)                                  | 9.9870(3)                                               | 9.9983(9)                                              | 9.3854(10)                                    |
| $\beta$ (°)                           | 91.2005(12)                                             | 91.204(3)                                              | 91.515(6)                                     |
| V (Å <sup>3</sup> )                   | 510.32(3)                                               | 511.62(8)                                              | 461.31(8)                                     |
| Z                                     | 2                                                       | 4                                                      | 2                                             |
| D <sub>c</sub> (g cm <sup>-3</sup> )  | 3.443                                                   | 3.434                                                  | 4.814                                         |
| $\mu$ (mm <sup>-1</sup> )             | 9.136                                                   | 9.113                                                  | 38.071                                        |
| F(000)                                | 476                                                     | 476                                                    | 580                                           |
| R1, wR2 (I > 2 $\sigma$ (I))          | 0.0162, 0.0405                                          | 0.0276, 0.0881                                         | 0.0402, 0.0588                                |
| R1, wR2 (all data)                    | 0.0212, 0.0906                                          | 0.0384, 0.0939                                         | 0.0772, 0.0764                                |

$$R_1 = \frac{\sum ||F_o| - |F_c||}{\sum |F_o|}; wR_2 = \frac{[\sum [w(F_o^2 - F_c^2)^2]]^{1/2}}{[\sum [w(F_o^2)^2]]^{1/2}}, \text{ and } w = 1/[\sigma^2 F_o^2 + (A \cdot P)^2 + B \cdot P], P = (F_o^2 + 2F_c^2)/3; A \text{ and } B \text{ are weight coefficients.}$$

**2. Table S2.** Atomic coordinate parameters for  $\alpha$ -Ba<sub>2</sub>P<sub>2</sub>S<sub>6</sub>,  $\beta$ -Ba<sub>2</sub>P<sub>2</sub>S<sub>6</sub>, and Pb<sub>2</sub>P<sub>2</sub>S<sub>6</sub>.

| Atoms                                                               | Wyckoff | x           | y          | z           | Occupancy | $U_{eq}$ (Å <sup>2</sup> ) |
|---------------------------------------------------------------------|---------|-------------|------------|-------------|-----------|----------------------------|
| <b><math>\alpha</math>-Ba<sub>2</sub>P<sub>2</sub>S<sub>6</sub></b> |         |             |            |             |           |                            |
| Ba1                                                                 | 2a      | 0.26582(18) | 0.3419(4)  | 0.97379(10) | 1         | 0.0137(6)                  |
| Ba2                                                                 | 2a      | 0.68861(19) | -0.1578(4) | 0.97524(13) | 1         | 0.0144(8)                  |
| P1                                                                  | 2a      | 0.184(3)    | 0.863(2)   | 0.7846(16)  | 1         | 0.009(3)                   |
| P2                                                                  | 2a      | -0.225(2)   | 0.366(2)   | 1.1624(16)  | 1         | 0.012(3)                   |
| S1                                                                  | 2a      | -0.211(2)   | 0.2753(19) | 0.9756(17)  | 1         | 0.014(3)                   |
| S2                                                                  | 2a      | 0.164(2)    | 0.777(2)   | 0.9776(17)  | 1         | 0.018(3)                   |
| S3                                                                  | 2a      | 0.053(2)    | 0.457(2)   | 0.6824(13)  | 1         | 0.015(3)                   |
| S4                                                                  | 2a      | 0.032(2)    | 0.452(2)   | 1.2462(14)  | 1         | 0.013(3)                   |
| S5                                                                  | 2a      | 0.403(2)    | 0.044(2)   | 0.7580(14)  | 1         | 0.016(3)                   |

|                                                                    |    |             |             |             |   |             |
|--------------------------------------------------------------------|----|-------------|-------------|-------------|---|-------------|
| S6                                                                 | 2a | 0.424(2)    | 0.0481(19)  | 1.2039(15)  | 1 | 0.014(3)    |
| <b><math>\beta</math>-Ba<sub>2</sub>P<sub>2</sub>S<sub>6</sub></b> |    |             |             |             |   |             |
| Ba1                                                                | 4e | 0.03858(5)  | 0.59197(5)  | 0.74938(3)  | 1 | 0.01486(15) |
| P1                                                                 | 4e | -0.0453(2)  | 0.11437(18) | 0.56081(15) | 1 | 0.0112(3)   |
| S1                                                                 | 4e | 0.1966(2)   | 0.2980(2)   | 0.97893(14) | 1 | 0.0144(3)   |
| S2                                                                 | 4e | 0.1748(2)   | 0.29313(19) | 0.53803(15) | 1 | 0.0150(3)   |
| S4                                                                 | 4e | -0.0620(2)  | 1.0265(2)   | 0.75068(14) | 1 | 0.0169(3)   |
| <b>Pb<sub>2</sub>P<sub>2</sub>S<sub>6</sub></b>                    |    |             |             |             |   |             |
| Pb1                                                                | 2a | 0.09293(10) | 0.1326(4)   | 0.54137(9)  | 1 | 0.0221(7)   |
| Pb2                                                                | 2a | 0.67133(10) | -0.3670(4)  | 0.54250(9)  | 1 | 0.0228(7)   |
| P1                                                                 | 2a | 0.1932(17)  | -0.3610(17) | 0.7258(12)  | 1 | 0.009(2)    |
| P2                                                                 | 2a | 0.0703(16)  | -0.1416(18) | 0.8575(14)  | 1 | 0.013(2)    |
| S1                                                                 | 2a | -0.1875(17) | -0.0556(19) | 0.7555(15)  | 1 | 0.017(3)    |
| S2                                                                 | 2a | -0.469(2)   | 0.2435(18)  | 0.5533(15)  | 1 | 0.016(3)    |
| S3                                                                 | 2a | 0.232(2)    | -0.2546(18) | 0.5299(14)  | 1 | 0.016(3)    |
| S4                                                                 | 2a | 0.9513(16)  | -0.5551(17) | 0.3261(12)  | 1 | 0.011(2)    |
| S5                                                                 | 2a | -0.0255(18) | 0.4463(17)  | 0.7370(14)  | 1 | 0.015(2)    |
| S6                                                                 | 2a | 0.2851(17)  | 0.0521(17)  | 0.8488(15)  | 1 | 0.014(2)    |

**3. Table S3.** Selected interatomic distances for  $\alpha$ -Ba<sub>2</sub>P<sub>2</sub>S<sub>6</sub>,  $\beta$ -Ba<sub>2</sub>P<sub>2</sub>S<sub>6</sub>, and Pb<sub>2</sub>P<sub>2</sub>S<sub>6</sub>.

| Atom Pairs                                                          |         | Distances<br>(Å) | Atom Pairs |           | Distances<br>(Å) |
|---------------------------------------------------------------------|---------|------------------|------------|-----------|------------------|
| <b><math>\alpha</math>-Ba<sub>2</sub>P<sub>2</sub>S<sub>6</sub></b> |         |                  |            |           |                  |
| Ba1                                                                 | S1      | 3.254(17)        | Ba2        | S1        | 3.353(15)        |
|                                                                     | S1      | 3.562(14)        |            | S2        | 3.568(17)        |
|                                                                     | S2      | 3.373(16)        |            | S2        | 3.244(17)        |
|                                                                     | S3      | 3.200(16)        |            | S3        | 3.218(16)        |
|                                                                     | S3      | 3.334(15)        |            | S4        | 3.360(14)        |
|                                                                     | S4      | 3.283(14)        |            | S5        | 3.253(17)        |
|                                                                     | S4      | 3.313(15)        |            | S5        | 3.261(16)        |
|                                                                     | S5      | 3.267(16)        |            | S6        | 3.277(15)        |
| P1                                                                  | S6      | 3.359(15)        | S6         | 3.316(15) |                  |
|                                                                     | S2      | 2.04(2)          | P2         | S1        | 1.99(2)          |
|                                                                     | S5      | 2.04(2)          |            | S3        | 2.02(2)          |
| S6                                                                  | 2.03(2) | S4               |            | 2.02(3)   |                  |
| P1                                                                  | P2      | 2.216(5)         |            |           |                  |
| <b><math>\beta</math>-Ba<sub>2</sub>P<sub>2</sub>S<sub>6</sub></b>  |         |                  |            |           |                  |
| Ba1                                                                 | S1      | 3.2825(15)       | P1         | S1        | 2.021(2)         |

|                                                 |    |            |     |    |           |
|-------------------------------------------------|----|------------|-----|----|-----------|
|                                                 | S1 | 3.3190(15) |     | S2 | 2.028(2)  |
|                                                 | S1 | 3.3581(16) |     | S4 | 2.017(2)  |
|                                                 | S2 | 3.2268(15) | P1  | P1 | 2.213(3)  |
|                                                 | S2 | 3.2453(16) |     |    |           |
|                                                 | S2 | 3.3040(15) |     |    |           |
|                                                 | S4 | 3.2530(16) |     |    |           |
|                                                 | S4 | 3.3662(18) |     |    |           |
|                                                 | S4 | 3.5658(16) |     |    |           |
| <b>Pb<sub>2</sub>P<sub>2</sub>S<sub>6</sub></b> |    |            |     |    |           |
| Pb1                                             | S1 | 3.102(14)  | Pb2 | S1 | 3.192(12) |
|                                                 | S1 | 3.142(13)  |     | S2 | 3.050(13) |
|                                                 | S2 | 3.004(13)  |     | S3 | 3.014(13) |
|                                                 | S3 | 3.032(14)  |     | S4 | 3.114(12) |
|                                                 | S4 | 3.214(13)  |     | S4 | 3.120(12) |
|                                                 | S5 | 3.086(14)  |     | S5 | 3.013(12) |
|                                                 | S6 | 3.015(12)  |     | S5 | 3.165(12) |
|                                                 | S6 | 3.184(13)  |     | S6 | 3.068(13) |
| P1                                              | S3 | 2.025(18)  | P2  | S1 | 2.033(16) |
|                                                 | S4 | 2.023(15)  |     | S2 | 2.011(19) |
|                                                 | S5 | 2.040(18)  |     | S6 | 2.026(17) |
| P1                                              | P2 | 2.216(6)   |     |    |           |

**4. Table S4.** Results of EDX analysis of selected crystals of  $\alpha$ -Ba<sub>2</sub>P<sub>2</sub>S<sub>6</sub>,  $\beta$ -Ba<sub>2</sub>P<sub>2</sub>S<sub>6</sub>, and Pb<sub>2</sub>P<sub>2</sub>S<sub>6</sub>.

| Spectrum                                                            | Measured results                                        | Normalized Composition                              |
|---------------------------------------------------------------------|---------------------------------------------------------|-----------------------------------------------------|
| <b><math>\alpha</math>-Ba<sub>2</sub>P<sub>2</sub>S<sub>6</sub></b> |                                                         |                                                     |
|                                                                     | (Atomic.%)<br>C 47.40<br>Ba 10.90<br>P 10.12<br>S 31.58 | Ba <sub>2.15</sub> P <sub>2</sub> S <sub>6.24</sub> |
|                                                                     | (Atomic.%)<br>C 59.91<br>Ba 8.13<br>P 7.68<br>S 24.27   | Ba <sub>2.11</sub> P <sub>2</sub> S <sub>6.32</sub> |
|                                                                     | (Atomic.%)<br>C 42.16<br>Ba 12.38<br>P 10.89<br>S 34.56 | Ba <sub>2.27</sub> P <sub>2</sub> S <sub>6.34</sub> |

|                                                                                     |                                                                   |                                                       |
|-------------------------------------------------------------------------------------|-------------------------------------------------------------------|-------------------------------------------------------|
| <b>Averaged</b>                                                                     |                                                                   | <b>Ba<sub>2.18</sub>P<sub>2</sub>S<sub>6.30</sub></b> |
| <b>β-Ba<sub>2</sub>P<sub>2</sub>S<sub>6</sub></b>                                   |                                                                   |                                                       |
| 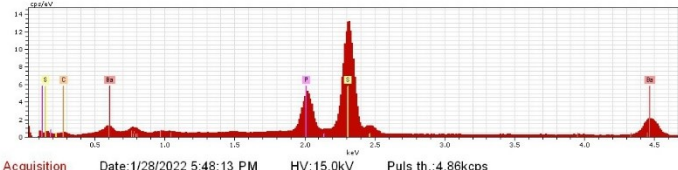   | (Atomic.%)<br>C 45.23<br>Ba 9.18<br>P 11.70<br>S 33.90            | Ba <sub>1.57</sub> P <sub>2</sub> S <sub>5.79</sub>   |
|    | (Atomic.%)<br>C 76.40<br>Ba 4.27<br>P 4.17<br>S 15.16             | Ba <sub>2.05</sub> P <sub>2</sub> S <sub>7.27</sub>   |
|    | (Atomic.%)<br>C 82.49<br>Ba 3.21<br>P 3.56<br>S 10.75             | Ba <sub>1.80</sub> P <sub>2</sub> S <sub>6.04</sub>   |
| <b>Averaged</b>                                                                     |                                                                   | <b>Ba<sub>1.81</sub>P<sub>2</sub>S<sub>6.37</sub></b> |
| <b>Pb<sub>2</sub>P<sub>2</sub>S<sub>6</sub></b>                                     |                                                                   |                                                       |
|  | (Atomic.%)<br>C 33.47<br>Pb 17.03<br>P 14.31<br>S 35.19<br>I 0.0  | Pb <sub>2.38</sub> P <sub>2</sub> S <sub>4.91</sub>   |
|  | (Atomic.%)<br>C 35.82<br>Pb 16.52<br>P 13.91<br>S 33.62<br>I 0.13 | Pb <sub>2.37</sub> P <sub>2</sub> S <sub>4.83</sub>   |
|  | (Atomic.%)<br>C 32.86<br>Pb 17.32<br>P 14.21<br>S 35.38<br>I 0.23 | Pb <sub>2.43</sub> P <sub>2</sub> S <sub>5.00</sub>   |
| <b>Averaged</b>                                                                     |                                                                   | <b>Pb<sub>2.39</sub>P<sub>2</sub>S<sub>4.91</sub></b> |
| <b>Notes: the large deviation of S is due to the overlap between Pb and S</b>       |                                                                   |                                                       |

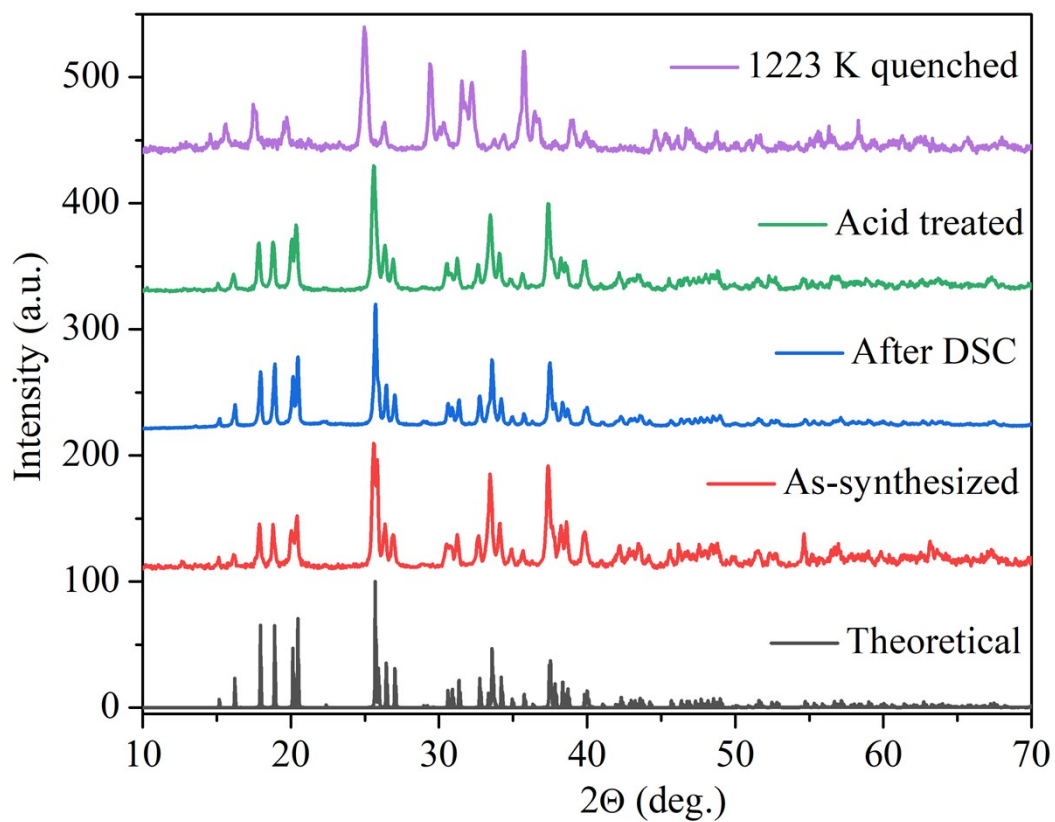

**5. Figure S1.** Powder X-ray diffraction results of theoretical, as-synthesized (stored in air for around 240 days), after DSC measurement, acid treated, and 1223 K quenched  $\text{Pb}_2\text{P}_2\text{S}_6$ .

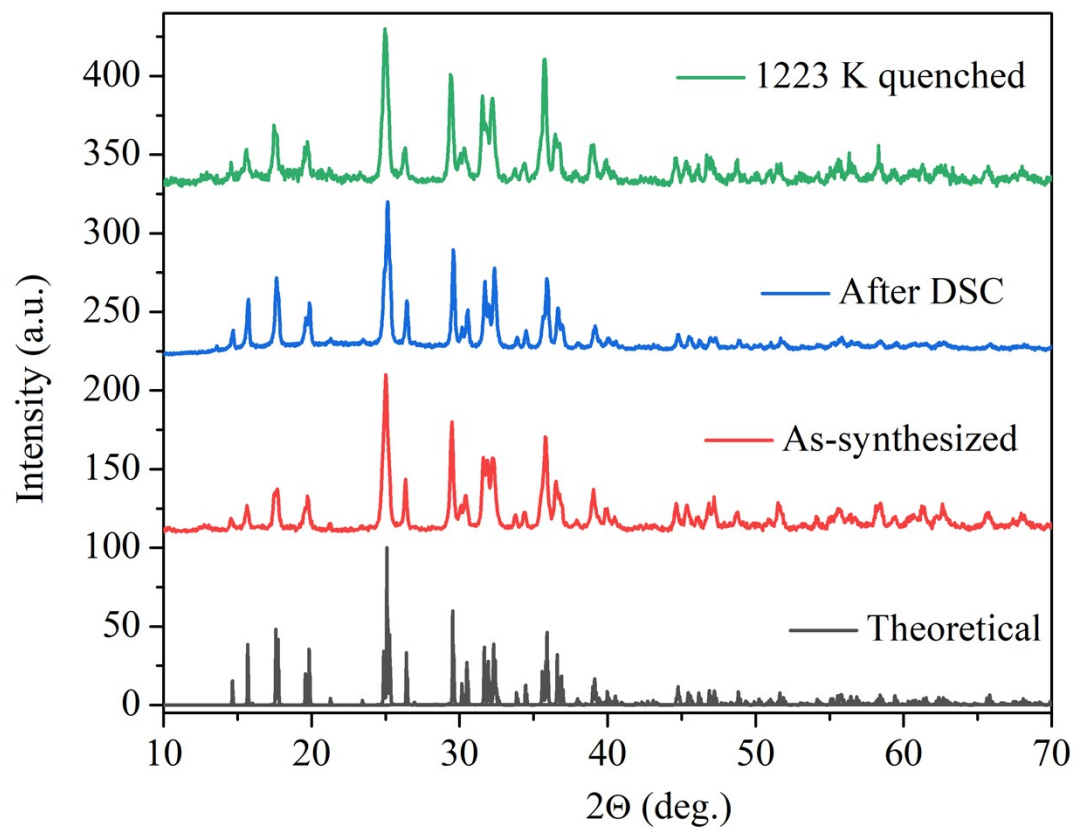

**6. Figure S2.** Powder X-ray diffraction results of theoretical, as-synthesized, after DSC measurement, and 1223 K quenched  $\alpha$ -Ba<sub>2</sub>P<sub>2</sub>S<sub>6</sub>.



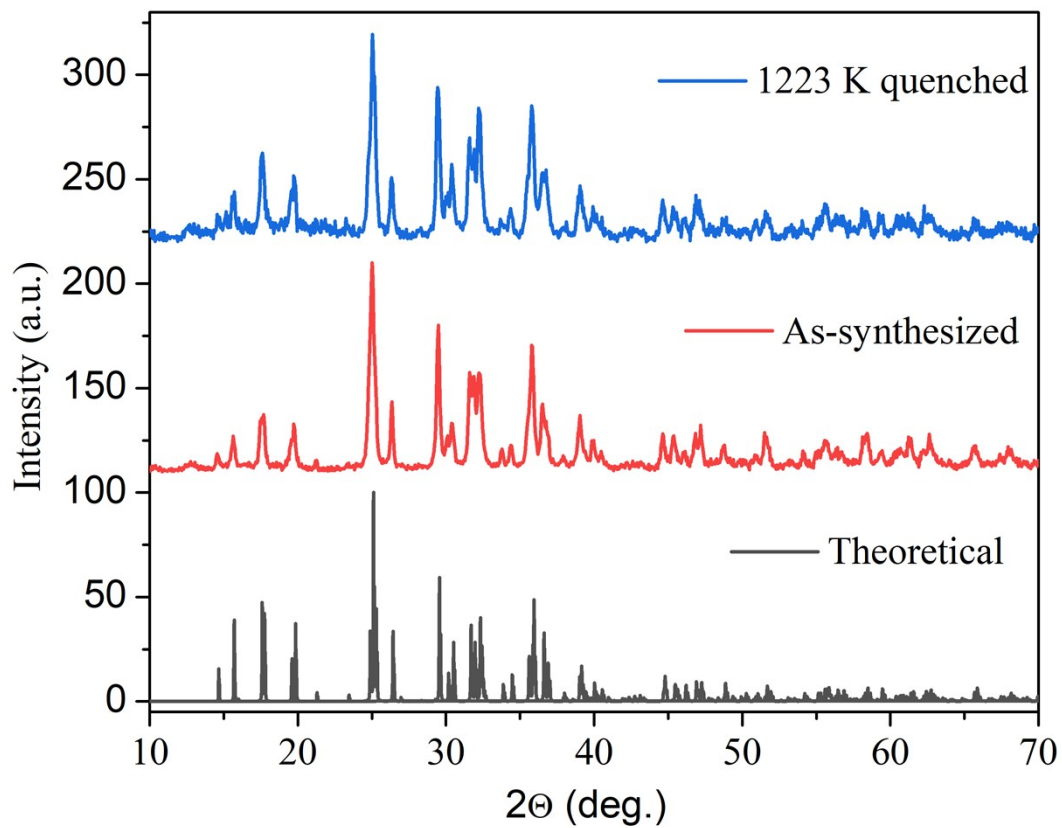

7. **Figure S3.** Powder X-ray diffraction results of theoretical, as-synthesized, and 1223 K quenched  $\beta$ -Ba<sub>2</sub>P<sub>2</sub>S<sub>6</sub>.

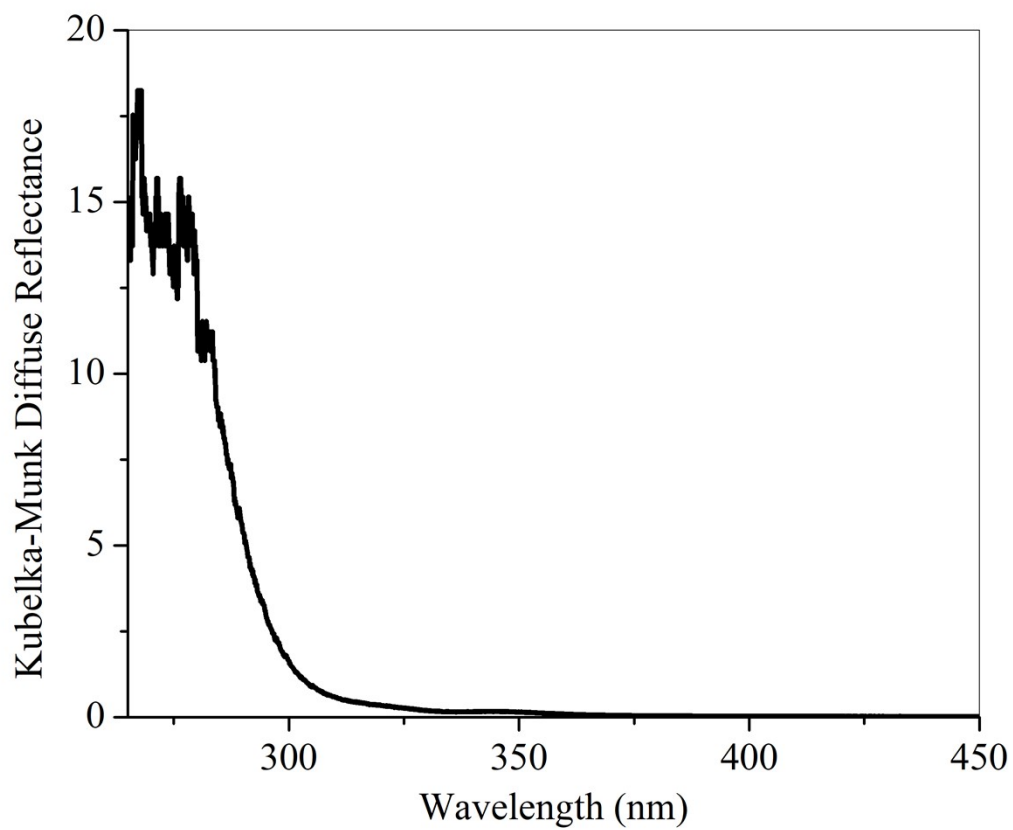

8. **Figure S4.** Kubelka-Munk Diffuse reflectance solid-state UV-Vis spectra of  $\alpha$ -Ba<sub>2</sub>P<sub>2</sub>S<sub>6</sub>.

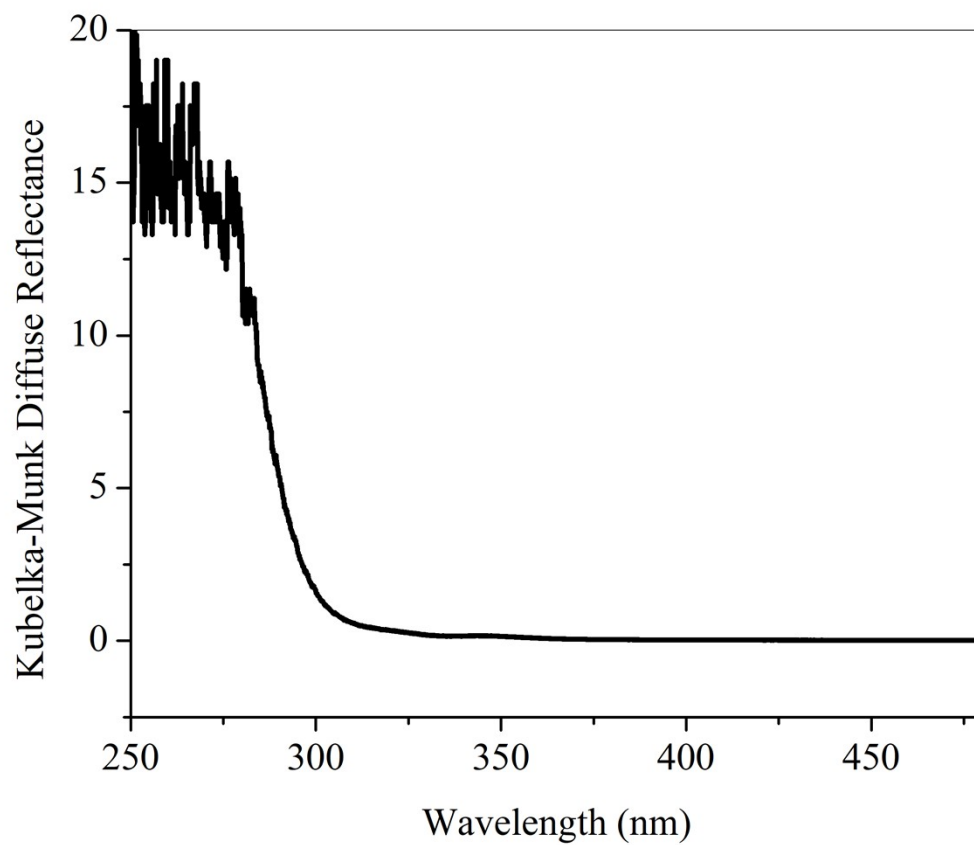

9. **Figure S5.** Kubelka-Munk Diffuse reflectance solid-state UV-Vis spectra of  $\beta$ -Ba<sub>2</sub>P<sub>2</sub>S<sub>6</sub>.

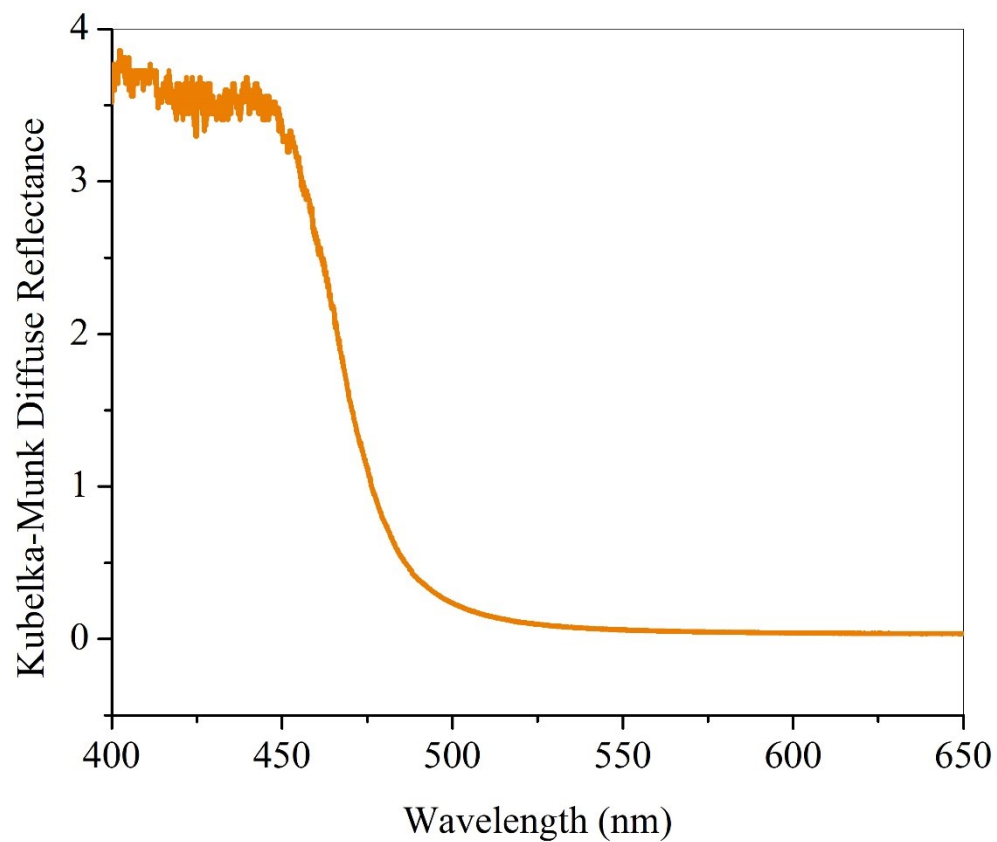

**10. Figure S6.** Kubelka-Munk Diffuse reflectance solid-state UV-Vis spectra of Pb<sub>2</sub>P<sub>2</sub>S<sub>6</sub>.

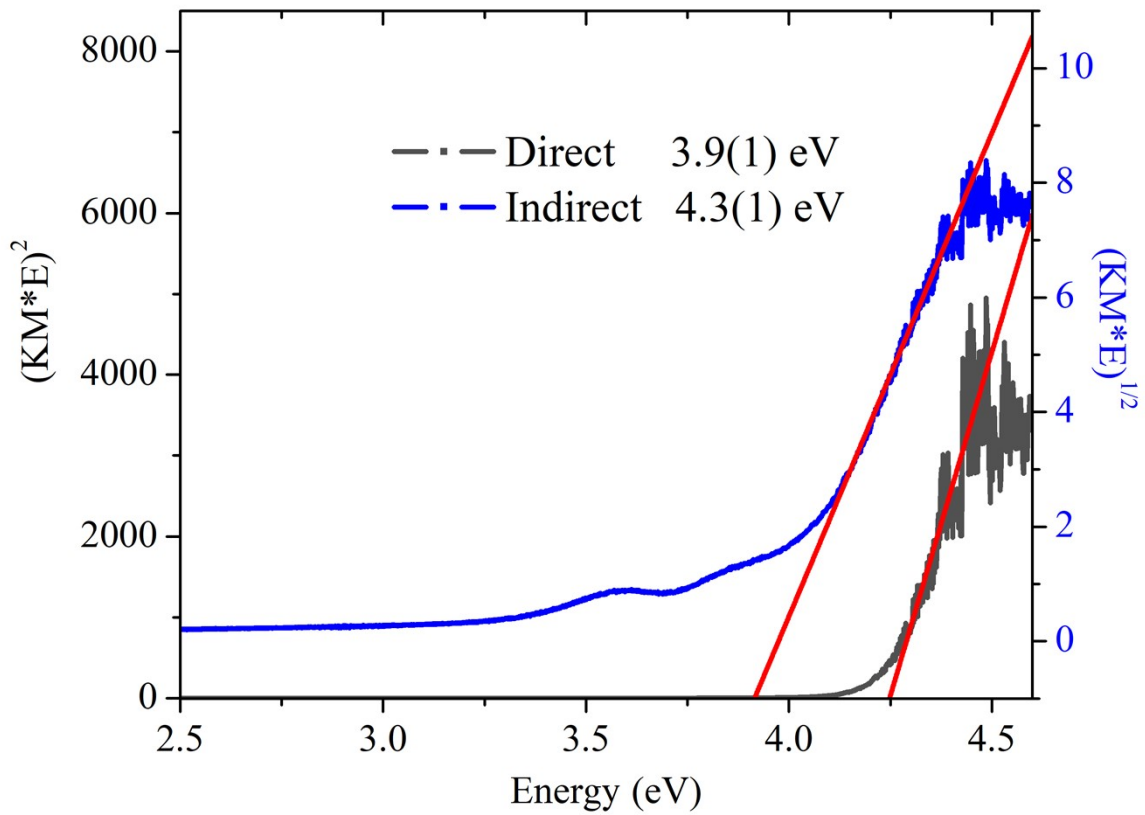

**11. Figure S7.** Tauc plots for allowed direct and indirect transitions of  $\alpha$ -Ba<sub>2</sub>P<sub>2</sub>S<sub>6</sub>.

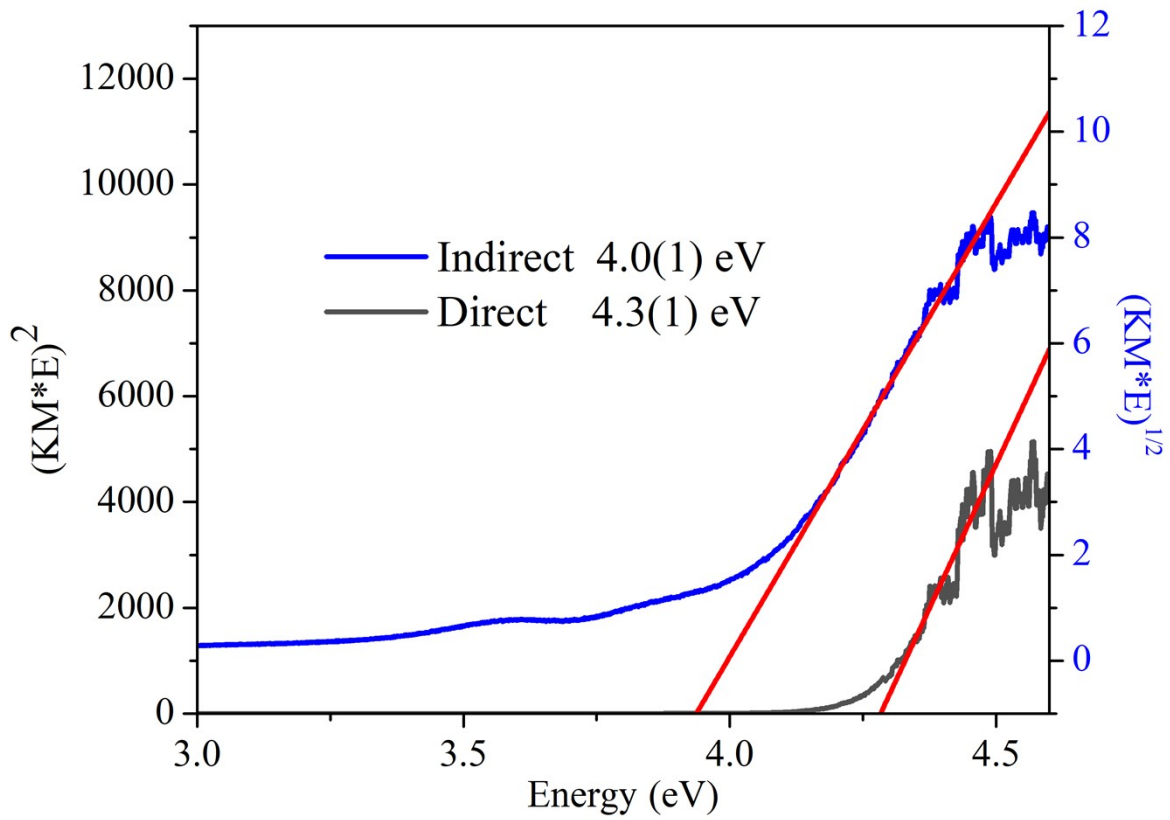

12. **Figure S8.** Tauc plots for allowed direct and indirect transitions of  $\beta\text{-Ba}_2\text{P}_2\text{S}_6$ .

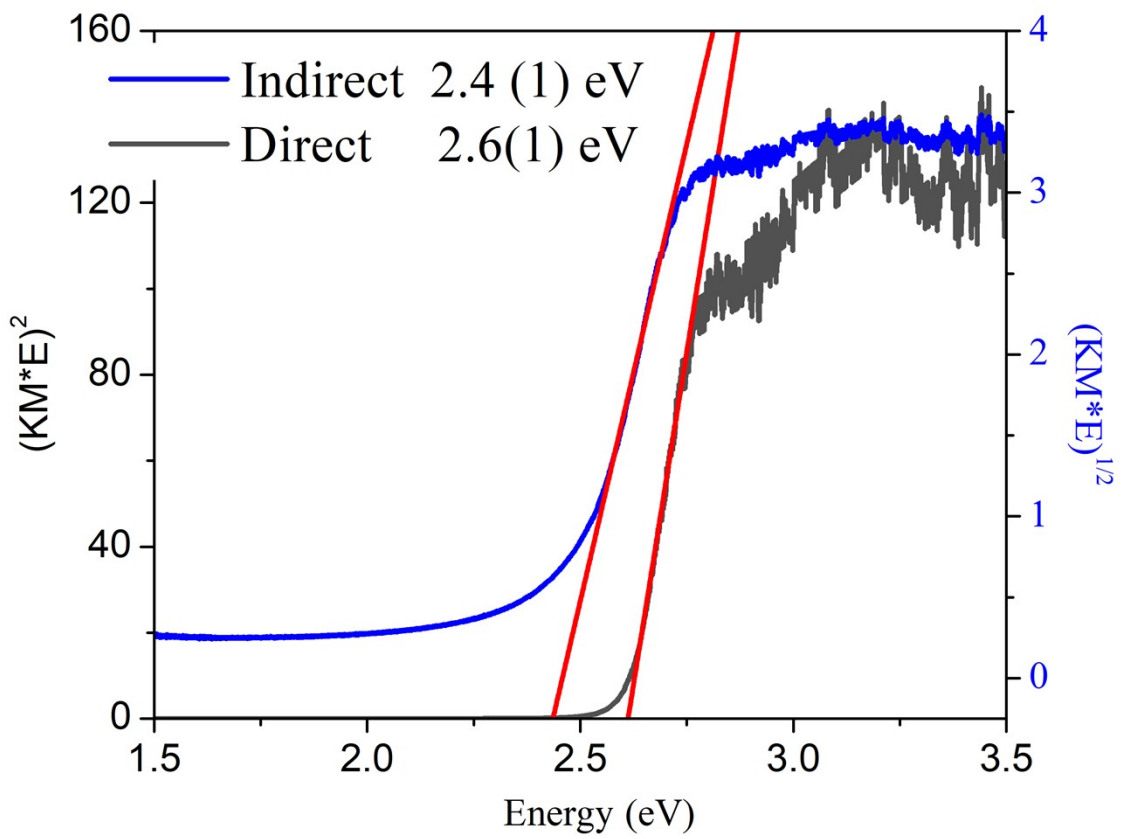

13. **Figure S9.** Tauc plots for allowed direct and indirect transitions of  $\text{Pb}_2\text{P}_2\text{S}_6$ .
